# Supplementary material for: Zr-Incorporating SBA-15 for conversion of the ethanol–acetaldehyde mixture to butadiene
Source: Royal Society of Chemistry journal article supplement (doi:10.1039/d0re00160k), 2020-01-01
Supplement: d0re00160k1.pdf [file d0re00160k1.pdf]

## Supporting Information

# Zr-incorporated SBA-15 for conversion of ethanol-acetaldehyde mixture to butadiene

Guochao Yang<sup>a,b</sup>, Lingtao Wang<sup>a,b</sup> and Haoxi Jiang<sup>a,b\*</sup>

<sup>a</sup> Key Laboratory for Green Chemical Technology of Ministry of Education, R&D Center for Petrochemical Technology, Tianjin University, Tianjin 300072, China

<sup>b</sup> Collaborative Innovation Center of Chemical Science and Engineering, Tianjin 300072, China

\*Corresponding author. Tel.: +86-22-27406119; fax: +86-22-27406119. E-mail address: hxjiang@tju.edu.cn

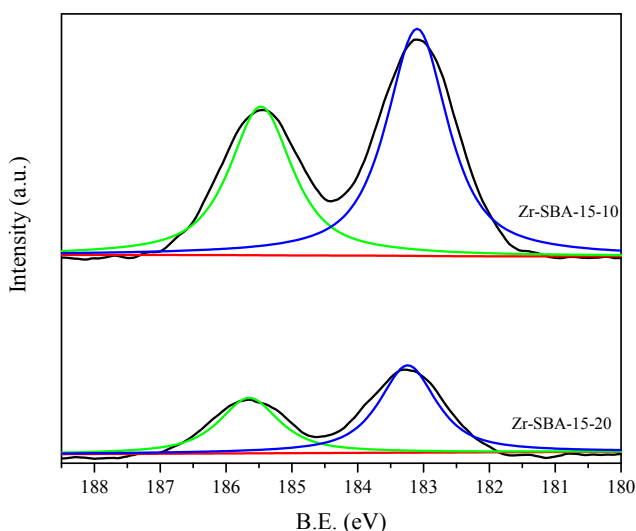

*Figure S1. Zr 3d XPS spectra of Zr-SBA-15-10 and Zr-SBA-15-20.*

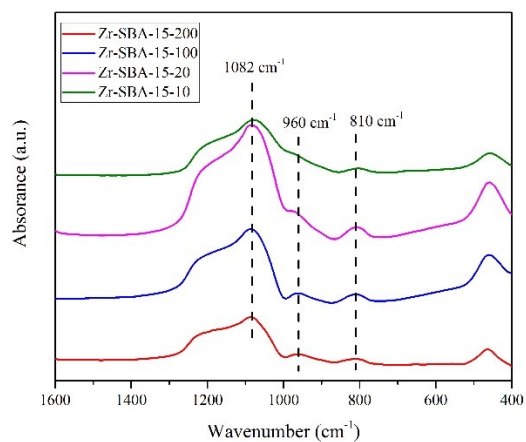

**Figure S2.** FT-IR spectra in the skeletal region of Zr-SBA-15 with different Si/Zr ratio .

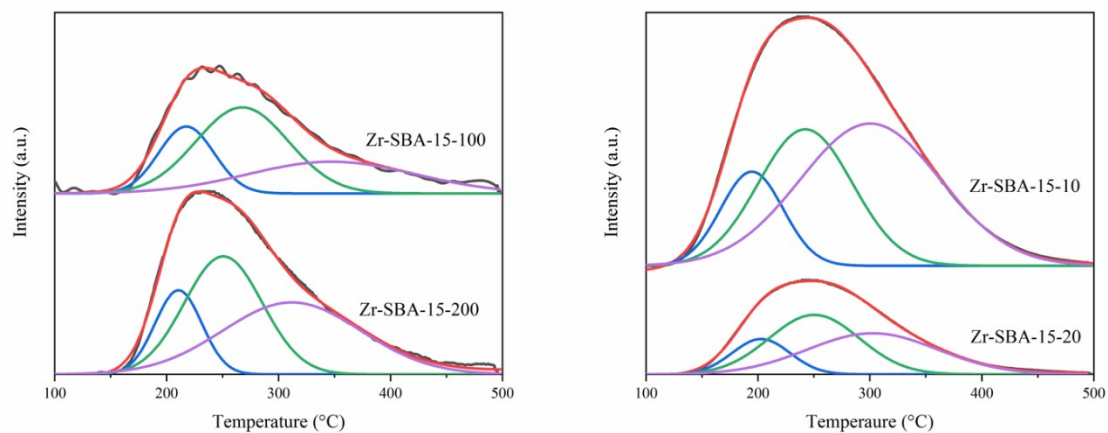

**Figure S3.** Deconvoluted NH<sub>3</sub>-TPD profiles of Zr-SBA-15.

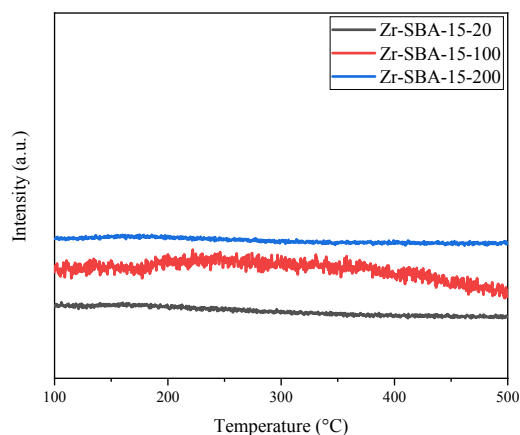

**Figure S4.  $CO_2$ -TPD profiles of Zr-SBA-15.**

**Table S1. Catalytic performance of Zr-SBA-15. Reaction temperature 350 °C, WHSV 1.6 h<sup>-1</sup>, EtOH/AcH molar ratio 3.0.**

| Sample        | EtOH/AcH Conversion(%) | EtOH Conversion | AcH Conversion | Carbon Selectivity(mol %) |          |               |           |                  |               |                 |        | BD Yield(%) |
|---------------|------------------------|-----------------|----------------|---------------------------|----------|---------------|-----------|------------------|---------------|-----------------|--------|-------------|
|               |                        |                 |                | Butadiene                 | ethylene | Diethyl ether | Propylene | Butylene isomers | Ethyl acetate | crotonal-dehyde | Others |             |
| Zr-SBA-15-200 | 13.4                   | 16.0            | 5.9            | 51.6                      | 22.2     | 7.9           | 1.9       | 3.5              | 2.0           | 4.3             | 6.6    | 6.9         |
| Zr-SBA-15-100 | 15.4                   | 18.3            | 7.9            | 47.3                      | 23.6     | 16.0          | 1.6       | 3.3              | 1.6           | 2.9             | 3.7    | 7.3         |
| Zr-SBA-15-20  | 61.9                   | 65.3            | 56.2           | 44.0                      | 31.9     | 7.6           | 2.2       | 7.1              | 1.0           | 0.8             | 5.4    | 27.2        |
| Zr-SBA-15-10  | 69.0                   | 70.8            | 63.6           | 29.7                      | 31.7     | 9.7           | 2.3       | 10.4             | 3.7           | 0.3             | 12.2   | 20.5        |

**Table S2a. Effect of temperature on the catalytic performance of Zr-SBA-15-20. WHSV 1.6 h<sup>-1</sup>, EtOH/AcH molar ratio 3.0.**

| Reaction Temp. (°C) | EtOH/AcH Conversion | EtOH Conversion | AcH Conversion | Carbon Selectivity(mol %) |          |               |           |                  |               |                 |        |
|---------------------|---------------------|-----------------|----------------|---------------------------|----------|---------------|-----------|------------------|---------------|-----------------|--------|
|                     |                     |                 |                | Butadiene                 | ethylene | Diethyl ether | Propylene | Butylene isomers | Ethyl acetate | crotonal-dehyde | Others |
| 350                 | 61.9                | 65.3            | 56.2           | 44.0                      | 31.9     | 7.6           | 2.2       | 7.1              | 1.0           | 0.8             | 5.4    |
| 325                 | 39.1                | 39.9            | 36.6           | 51.6                      | 24.5     | 8             | 2         | 6.7              | 1.8           | 0.6             | 4.8    |

|     |      |      |      |      |      |      |     |     |     |     |     |
|-----|------|------|------|------|------|------|-----|-----|-----|-----|-----|
| 300 | 31.3 | 30.4 | 33.7 | 58.4 | 16.1 | 11.6 | 1.6 | 5.4 | 2.5 | 0.8 | 3.6 |
| 275 | 19.2 | 18.7 | 20.9 | 68.9 | 6.5  | 9.3  | 1.1 | 3.6 | 3.5 | 2.3 | 4.8 |

**Table S2b. Effect of EtOH/AcH ratio on the catalytic performance of Zr-SBA-15-20.**

**Reaction temperature 275 °C, WHSV 1.6 h<sup>-1</sup>.**

| EtOH/AcH<br>Molar<br>Ratio | EtOH/AcH<br>Conversion | EtOH<br>Conversion | AcH<br>Conversion | Carbon Selectivity(mol %) |          |                  |           |                     |                  |                     |        |
|----------------------------|------------------------|--------------------|-------------------|---------------------------|----------|------------------|-----------|---------------------|------------------|---------------------|--------|
|                            |                        |                    |                   | Butadiene                 | ethylene | Diethyl<br>ether | Propylene | Butylene<br>isomers | Ethyl<br>acetate | crotonal-<br>dehyde | Others |
| 1.2                        | 20.3                   | 17.7               | 23.4              | 69.2                      | 2.8      | 2.8              | 1.2       | 2.5                 | 3.9              | 13.0                | 3.4    |
| 2                          | 16.5                   | 17.3               | 14.7              | 71.3                      | 3.9      | 4.0              | 1.2       | 2.8                 | 3.9              | 6.6                 | 5.4    |
| 3                          | 19.2                   | 18.7               | 20.9              | 68.9                      | 6.5      | 9.3              | 1.1       | 3.6                 | 3.5              | 4.8                 | 4.4    |

**Table S2c. Effect of WHSV on the catalytic performance of Zr-SBA-15-20. Reaction temperature 275 °C, EtOH/AcH molar ratio 2.0.**

| WHSV<br>(h <sup>-1</sup> ) | EtOH/AcH<br>Conversion | EtOH<br>Conversion | AcH<br>Conversion | Carbon Selectivity(mol %) |          |                  |           |                     |                  |                     |        |
|----------------------------|------------------------|--------------------|-------------------|---------------------------|----------|------------------|-----------|---------------------|------------------|---------------------|--------|
|                            |                        |                    |                   | Butadiene                 | ethylene | Diethyl<br>ether | Propylene | Butylene<br>isomers | Ethyl<br>acetate | crotonal-<br>dehyde | Others |
| 0.32                       | 42.8                   | 37.8               | 52.7              | 70.6                      | 9.9      | 4.1              | 1.8       | 4.5                 | 1.7              | 1.1                 | 6.4    |
| 0.64                       | 33.4                   | 28.4               | 43.6              | 70.7                      | 9.1      | 4                | 1.6       | 4.2                 | 2.8              | 1.7                 | 5.9    |
| 0.96                       | 28.3                   | 25.5               | 33.9              | 74.0                      | 6.4      | 3.8              | 1.5       | 3.2                 | 2.9              | 2.6                 | 5.6    |
| 1.28                       | 24                     | 21.1               | 30.0              | 73.8                      | 5.4      | 3.4              | 1.4       | 2.3                 | 3.1              | 3.9                 | 6.7    |
| 1.6                        | 18.3                   | 15.6               | 23.7              | 72.0                      | 4.7      | 3.4              | 1.3       | 1.7                 | 3.6              | 5.8                 | 7.5    |

**Table S3. Effect of catalyst preparation method on the catalytic performance. Reaction temperature 275 °C, EtOH/AcH molar ratio 2.0, WHSV 0.96 h<sup>-1</sup>.**

| Catalyst | EtOH/AcH<br>Conversion | Carbon Selectivity(mol %) |          |               |           |                     |                  |                     |        |  |
|----------|------------------------|---------------------------|----------|---------------|-----------|---------------------|------------------|---------------------|--------|--|
|          |                        | Butadiene                 | ethylene | Diethyl ether | Propylene | Butylene<br>isomers | Ethyl<br>acetate | crotonal-<br>dehyde | Others |  |

---

|                            |      |      |     |      |     |     |     |      |      |
|----------------------------|------|------|-----|------|-----|-----|-----|------|------|
| Zr-SBA-15-20               | 28.3 | 74.0 | 6.4 | 3.8  | 1.5 | 3.2 | 2.9 | 2.6  | 5.6  |
| ZrO <sub>2</sub> /SBA-15-M | 9.0  | 46.2 | 5.3 | 14.8 | 0.6 | 0.7 | 4.5 | 14.8 | 13.1 |

---
